# Supplementary material
Source: Research Square preprint supplement (doi:10.21203/rs.3.rs-9519280/v1)
Supplement: Supplementary file 1 [file f154f088f2f9ee3e45ff5289.docx]

**Barriers and enablers of business intelligence system adoption in municipal revenue collection in Zimbabwe**

**Clainos Chidoko**

Great Zimbabwe University, Department of Economics and Finance.

Box 1235, Masvingo, Zimbabwe

https://orcid.org/0000-0003-4530-7500

cchidoko@gmail.com; Corresponding Author

**Lawrence Tanyanyiwa**

Masvingo City Council, Department of Information Technology,

Masvingo, Zimbabwe

https://orcid.org/0000-0002-1570-8311

Email: [lawretanya@gmail.com](mailto:lawretanya@gmail.com)

**Ivy Jean Marima**

Great Zimbabwe University, Department of Mathematics and Computer Science.

Box 1235, Masvingo, Zimbabwe

https://orcid.org/0009-0003-1146-5399

[imarima@gzu.ac.zw](mailto:imarima@gzu.ac.zw)

**Mercy Nyasha Magoso**

Great Zimbabwe University, Department of Mathematics and Computer Science.

Box 1235, Masvingo, Zimbabwe

<https://orcid.org/0009-0007-9461-5098>

mercymagoso@gmail.com

**Njodzi Ranganai**

Midlands State University, Department of Information and Marketing Sciences.

Gweru, Zimbabwe,

<https://orcid.org/0000-0003-0451-1417>

[ranganain@staff.msu.ac.zw](mailto:ranganain@staff.msu.ac.zw)
